# Supplementary material for: Parathyroid hormone signaling in mature osteoblasts/osteocytes protects mice from age-related bone loss
Source: publisher site journal article supplement (doi:10.18632/aging.203808), 2021-12-30
Supplement: Supplementary file [file aging-v13i24-203808-supplementary-material-SD2.pdf]

**SUPPLEMENTARY FIGURES**

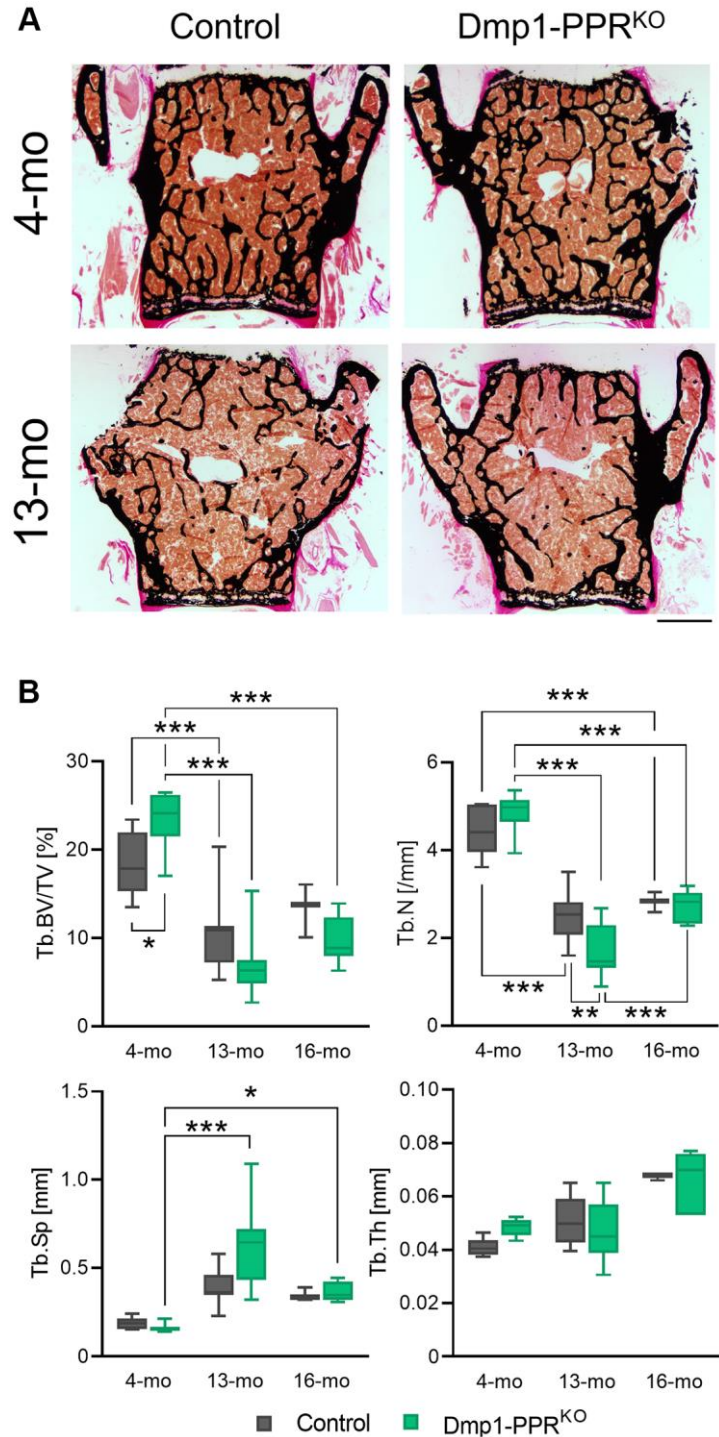

**Supplementary Figure 1. Analysis of the skeletal phenotype of Dmp1-PPR<sup>KO</sup> mice.** (A) Representative images of Von Kossa staining on the L5 vertebrae of 4- and 13-month-old male control and Dmp1-PPR<sup>KO</sup> mice. (B) Skeletal parameters of the distal femora analyzed by  $\mu$ CT were compared among male control and Dmp1-PPR<sup>KO</sup> animals at different ages (4, 13, or 16 months of age). Data is shown as box and whisker plot.  $N = 7-15$  per group. Two-way ANOVA with Tukey's *post hoc* test was performed. \* $p < 0.05$ , \*\* $p < 0.01$ , \*\*\* $p < 0.001$ .

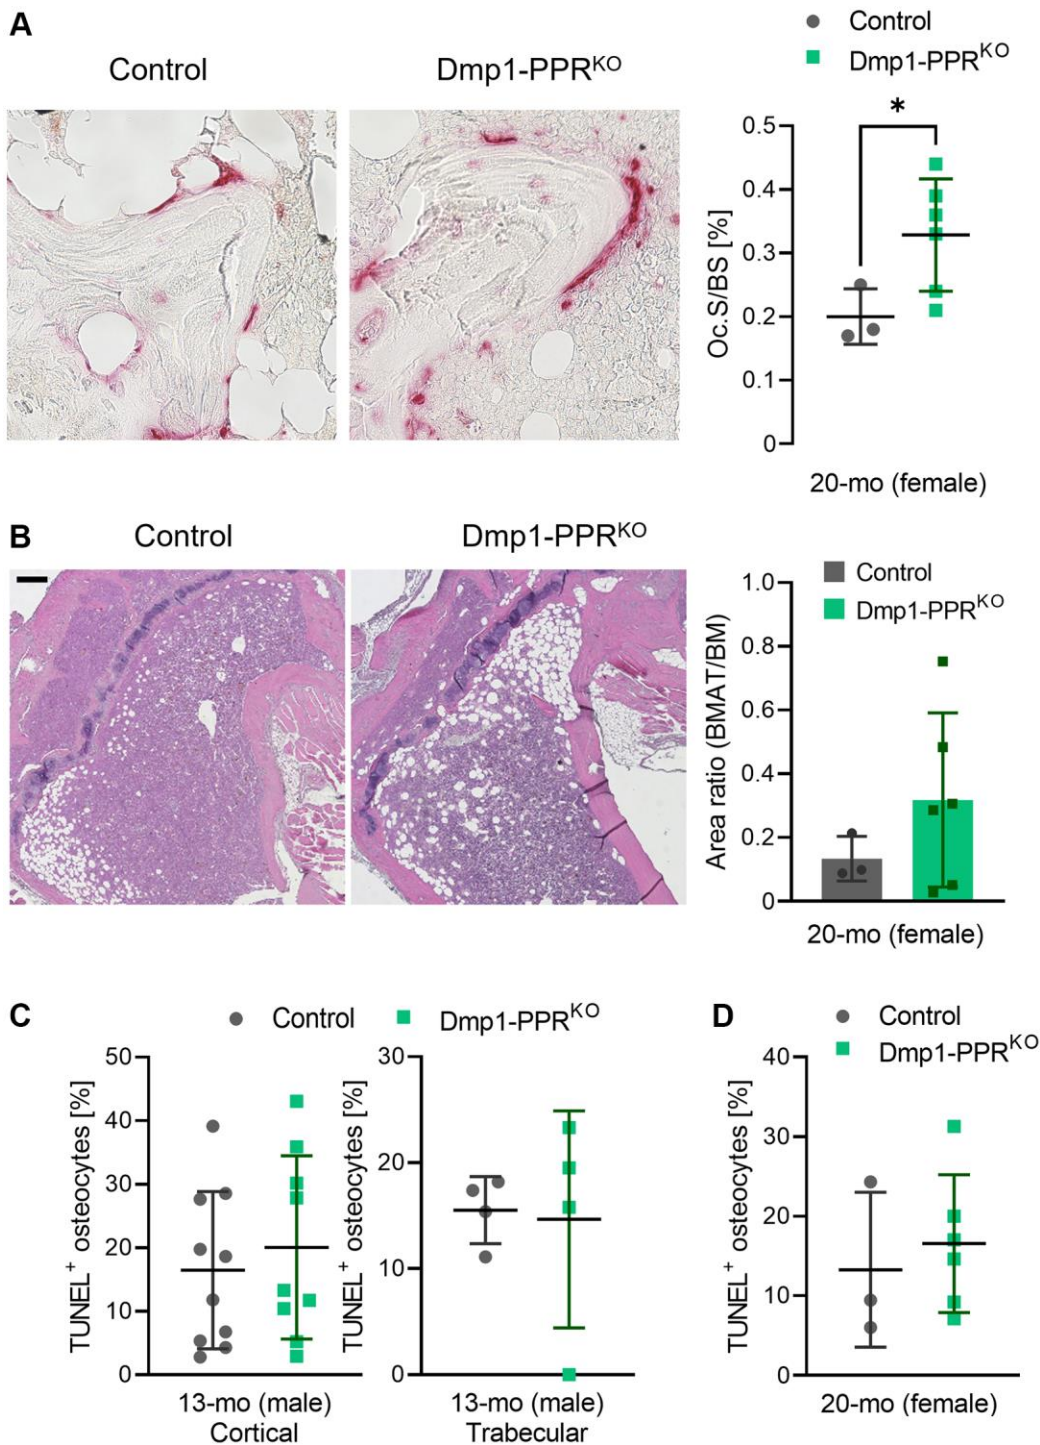

**Supplementary Figure 2.** (A) Representative images of TRAP staining and quantification of Oc.S/BS on the proximal tibiae (trabecular compartment) of female control and Dmp1-PPR<sup>KO</sup> mice at 20 months of age are shown. *N* = 3–6 per group. (B) Representative images of H&E staining and quantification of BMAT/BM ratio on the proximal tibiae of female control and Dmp1-PPR<sup>KO</sup> mice at 20 months old are shown. *N* = 3–6 per group. (C, D) TUNEL analysis on the tibiae from aging control and Dmp1-PPR<sup>KO</sup> mice. (C) Quantification of TUNEL+ osteocytes in the tibiae of 13-month-old male control and Dmp1-PPR<sup>KO</sup> mice is shown. Analysis was performed on the cortical region (left, midshaft) and the trabecular region (right, proximal) of the tibiae. *N* = 4–10 per group. (D) Quantification of TUNEL+ osteocytes in the tibiae (cortical region) of 20-month-old female control and Dmp1-PPR<sup>KO</sup> mice is shown. *N* = 3–6 per group. Data are presented as mean ± SD. Unpaired student's or Welch's *t* test was performed. \**p* < 0.05.

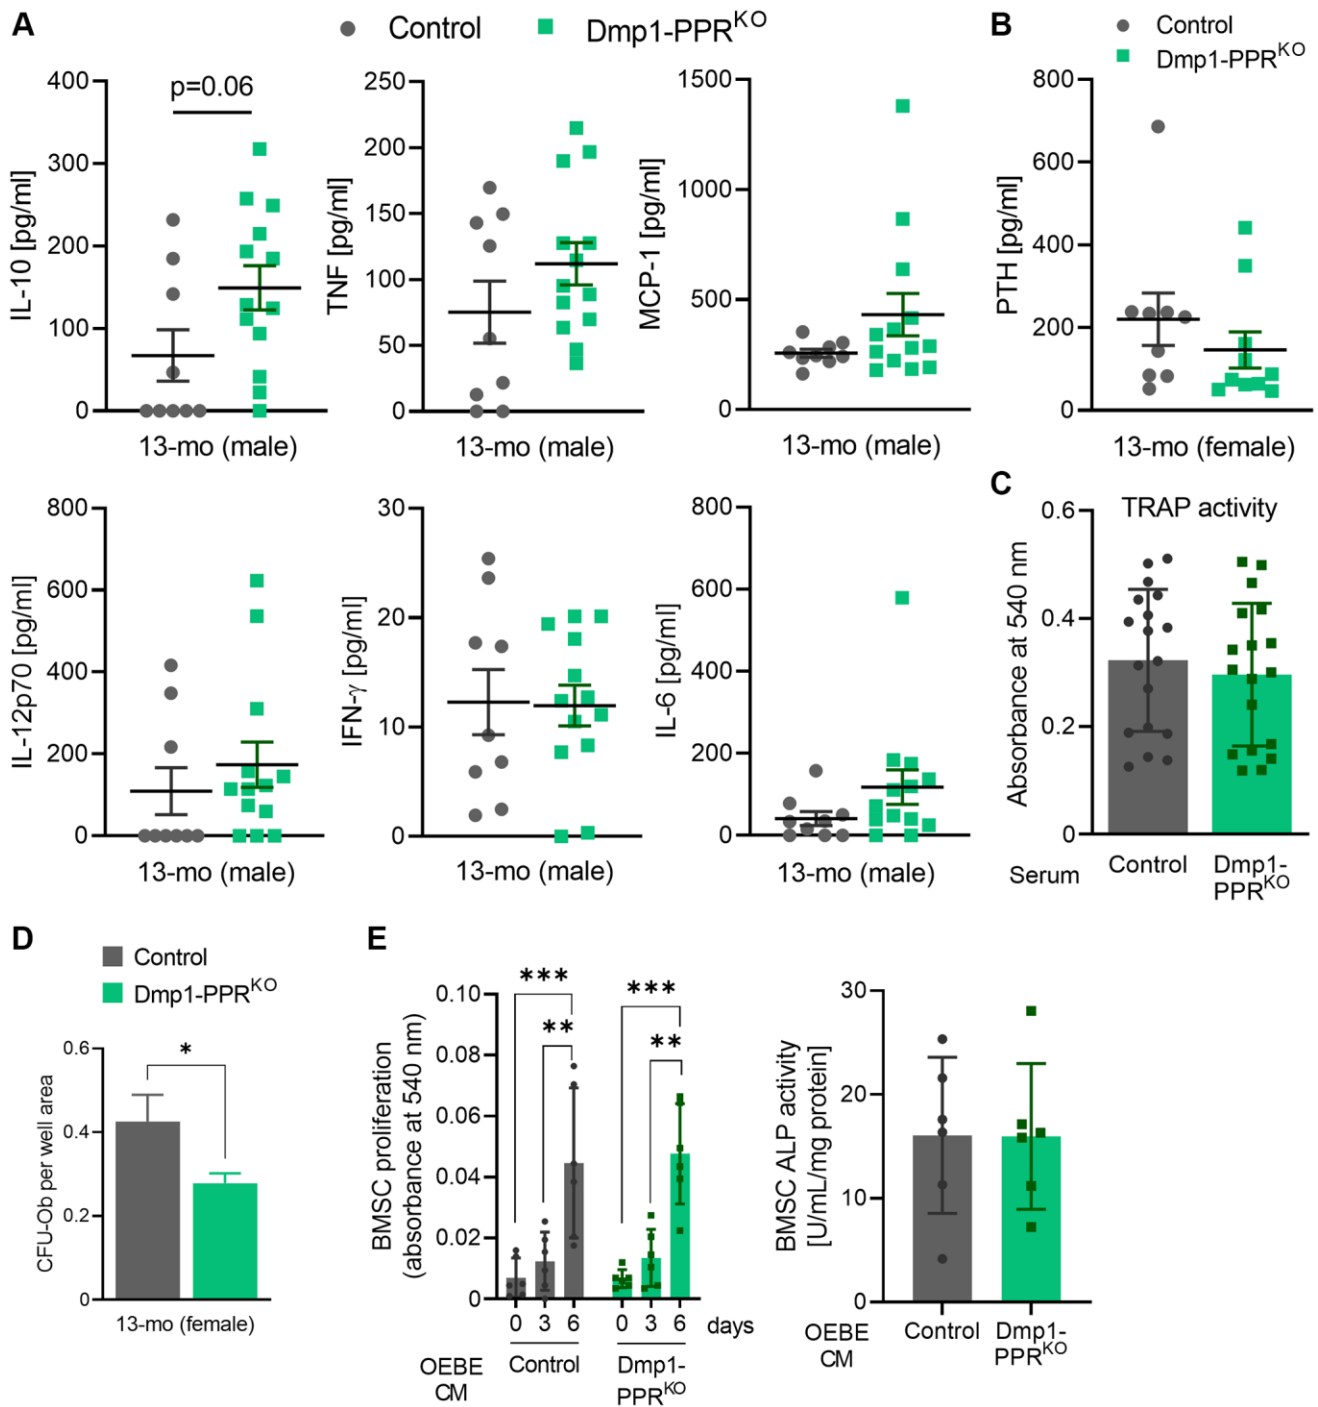

**Supplementary Figure 3.** (A) Serum cytokines in 13-month-old Dmp1-PPR<sup>KO</sup> mice were analyzed. Quantification of serum cytokines of 13-month-old male control and Dmp1-PPR<sup>KO</sup> mice is shown. Data are expressed as mean  $\pm$  SEM.  $N = 7$ –13 per group. (B) Serum PTH levels in 13-month-old female mice were analyzed by ELISA. Means  $\pm$  SEM are shown. (C) TRAP activity was measured in the conditioned medium from BMSCs under osteoclastic differentiation in the presence of control or Dmp1-PPR<sup>KO</sup> serum. Means  $\pm$  SD are shown. (D) CFU-Ob assay was performed on BMSCs isolated from female control and Dmp1-PPR<sup>KO</sup> mice at 13 months of old is shown. Means  $\pm$  SEM are shown. (E) Proliferation (left) and ALP activity measured on BMSCs under osteogenic differentiation in the presence of conditioned medium from control and Dmp1-PPR<sup>KO</sup> OEBEs culture. Means  $\pm$  SD are shown. Unpaired student's  $t$  test was performed. \* $p < 0.05$ , \*\* $p < 0.01$ , \*\*\* $p < 0.001$ .

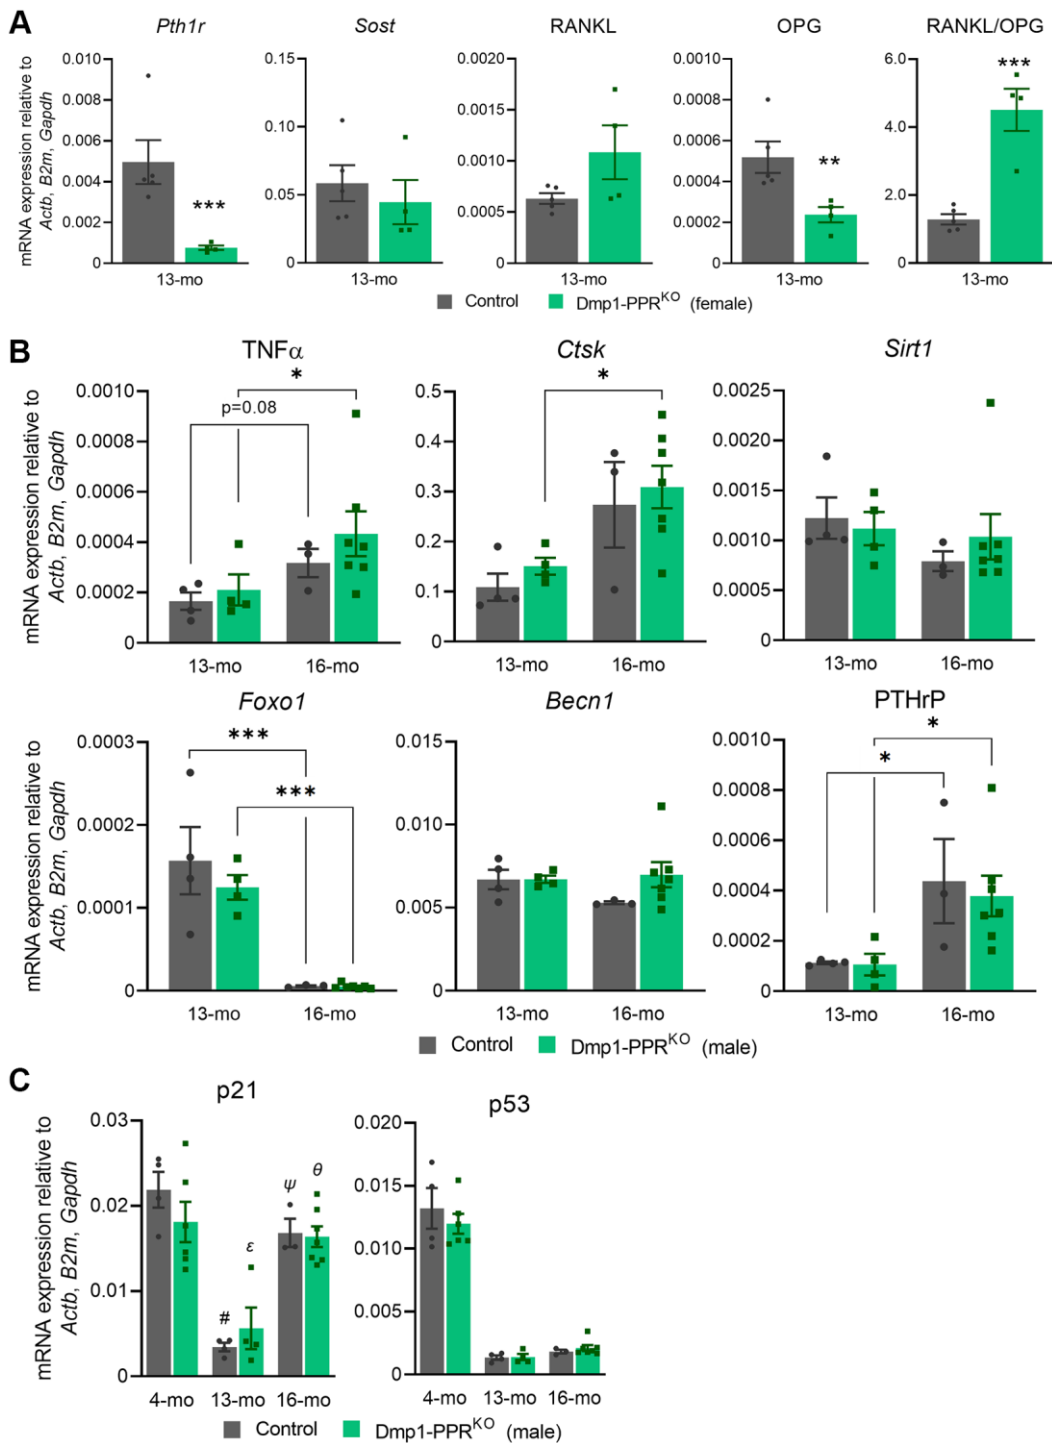

**Supplementary Figure 4.** (A) Gene expression in marrow-removed femora from 13-month-old female mice is shown.  $N = 4-5$  per group. (B, C) Gene expression in the tibiae and/or femora of control and Dmp1-PPR<sup>KO</sup> mice in male (4, 13, and 16 months of age). Expression of genes involved in osteoclasts, autophagy and/or senescence was analyzed by qPCR.  $N = 4-11$  per group. Data are presented as mean  $\pm$  SEM. One-way ANOVA with Sidak's *post hoc* test, Two-way ANOVA with Tukey's *post hoc* test or unpaired student's *t* test was performed. \* $p < 0.05$ , \*\*\* $p < 0.001$ , # $p < 0.001$  (vs. 4-mo Control),  $\epsilon p < 0.001$  (vs. 4-mo Dmp1-PPR<sup>KO</sup>),  $\psi p < 0.001$  (vs. 13-mo Control),  $\theta p < 0.001$  (vs. 13-mo Dmp1-PPR<sup>KO</sup>).

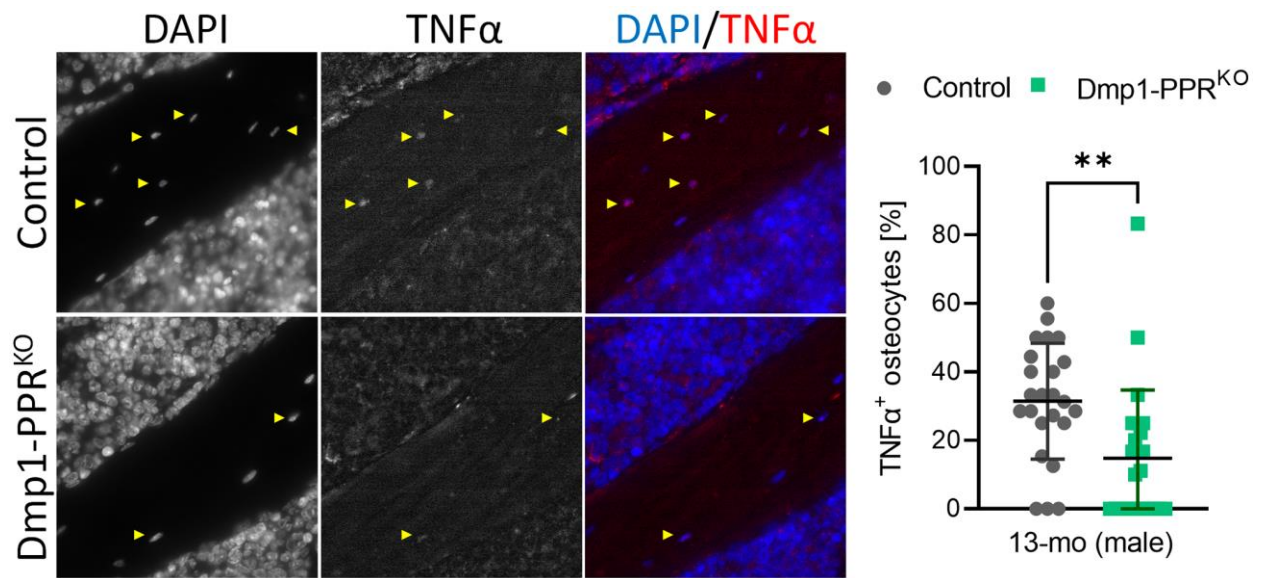

**Supplementary Figure 5. Representative TNF $\alpha$  immunofluorescent images of the tibia of 13-month-old male mice.** The frequency of TNF $\alpha$ <sup>+</sup> (red) osteocytes (yellow arrowheads) per field was quantified over the total number of osteocytes (stained with DAPI, blue).  $N = 4$  per group. Data are presented as mean  $\pm$  SD. Unpaired Welch's  $t$  test was performed. \*\* $p < 0.01$ .

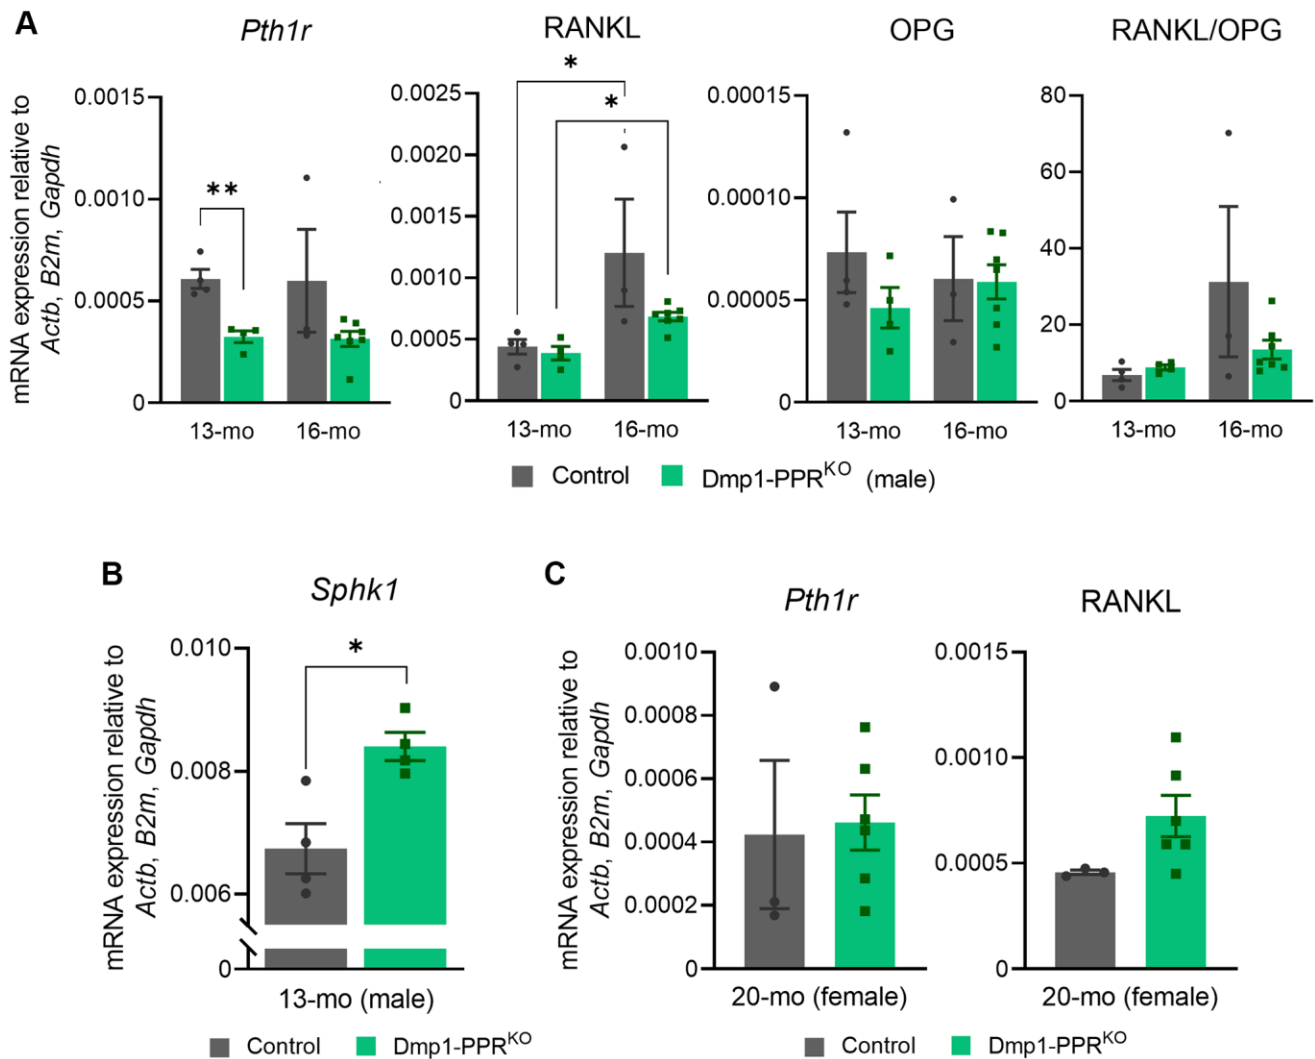

**Supplementary Figure 6. Gene expression in bone marrow cells of control and Dmp1-PPR<sup>KO</sup> mice.** (A) Expression of PPR, RANKL, OPG and RANKL/OPG ratio in bone marrow from middle-aged male control and Dmp1-PPR<sup>KO</sup> mice (13 and 16 months old) was analyzed by qPCR.  $N = 3-11$  per group. (B) Expression of *Sphk1* in the bone marrow isolated from the femora of middle-aged male animals (13-month-old) was analyzed by qPCR.  $N = 4$  per group. (C) Expression of PPR and RANKL in bone marrow from female control and Dmp1-PPR<sup>KO</sup> mice (20 months old) was analyzed by qPCR.  $N = 3-6$  per group. Data are presented as mean  $\pm$  SEM. Unpaired Student's  $t$  test was performed. \* $p < 0.05$ , \*\* $p < 0.01$ .

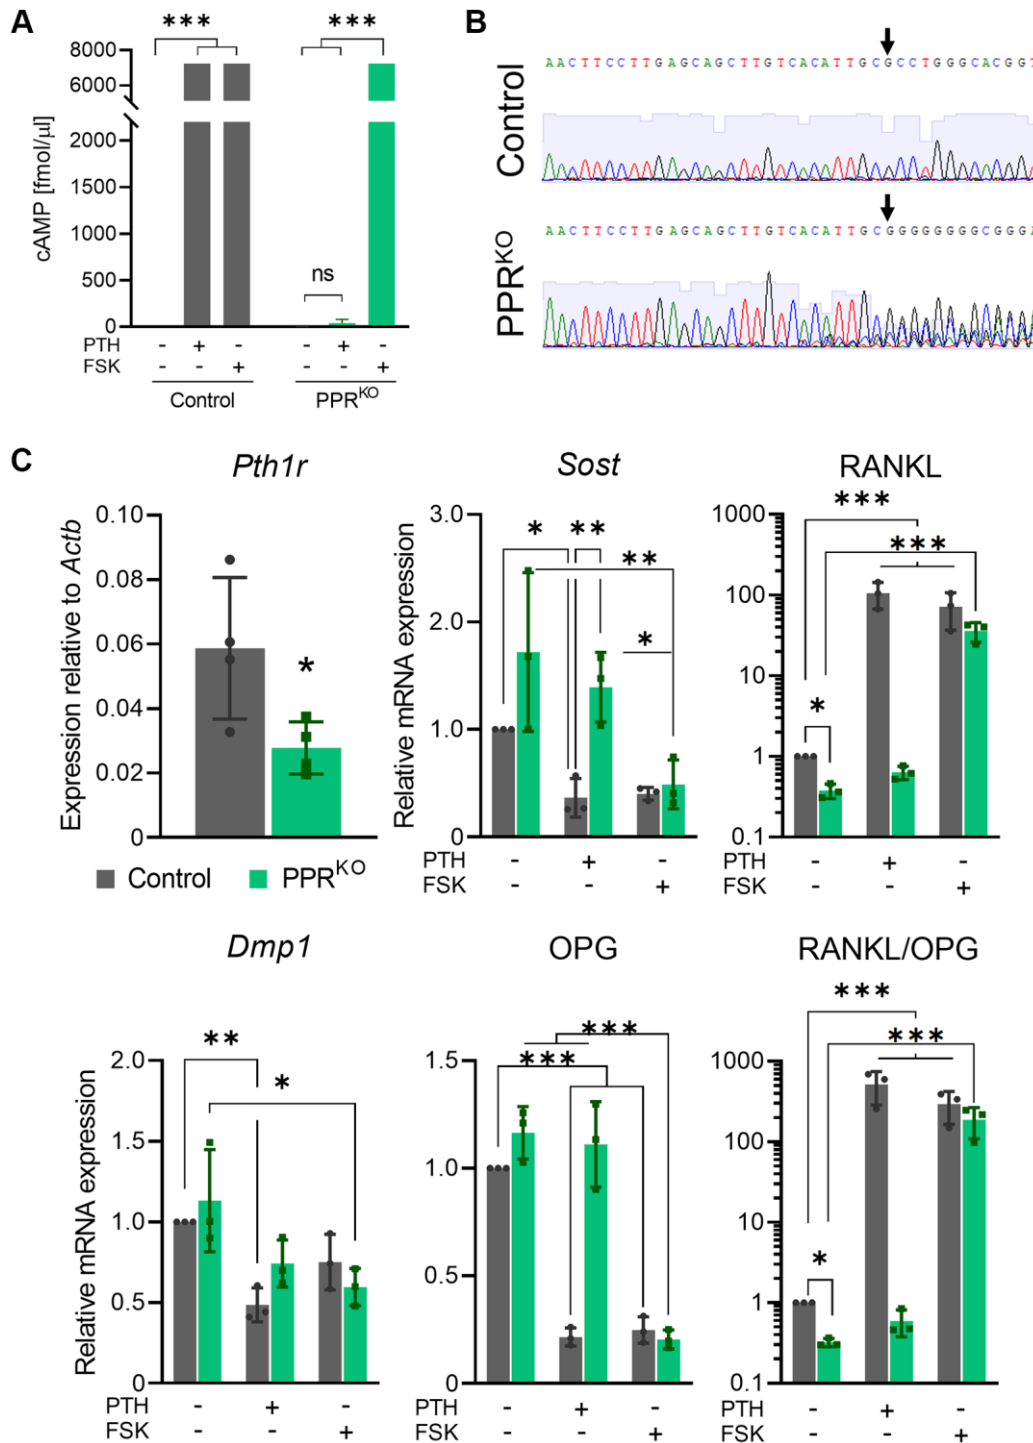

**Supplementary Figure 7. Characterization of Ocy454-12H PPR<sup>KO</sup> cells.** (A) cAMP accumulation assay in 10 nM PTH- or 10  $\mu$ M forskolin-treated control and PPR<sup>KO</sup> cells. PPR<sup>KO</sup> cells showed no cAMP response to PTH but forskolin. (B) Sanger DNA sequencing results of the targeted *Pth1r* exon 3 sequence in control and PPR<sup>KO</sup> cells are shown. Black arrows indicate the cleavage site by Cas9 protein. Unlike control cells, the sequence of PPR<sup>KO</sup> after the cleavage site was unreadable due to random repair via nonhomologous end joining (NHEJ). (C) Expression of PPR and osteocytic genes in control and PPR<sup>KO</sup> cells treated with 10 nM PTH or 10  $\mu$ M forskolin was analyzed by qPCR.  $N = 3$  per group. Data are presented as mean  $\pm$  SD. Two-way ANOVA with Tukey's *post hoc* test was performed. \* $p < 0.05$ , \*\* $p < 0.01$ , \*\*\* $p < 0.001$ .

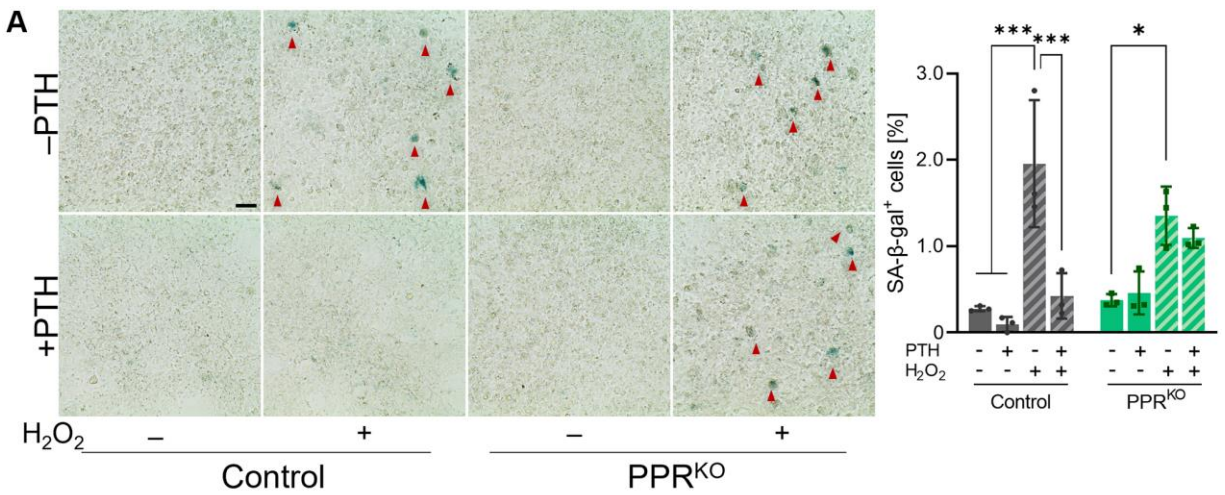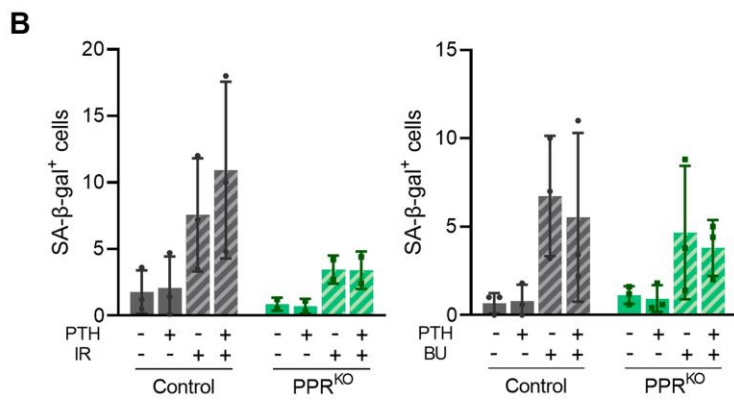

**Supplementary Figure 8.** (A) SA β-gal staining on Ocy454-12H PPR<sup>KO</sup> under oxidative stress. Cells were pretreated with 10 nM hPTH(1–34) for 18–22 hrs and then exposed to H<sub>2</sub>O<sub>2</sub> (150 μM, 7 days). (B) SA β-gal staining on irradiated (5 Gy) or busulfan (50 μM)-treated control and PPR<sup>KO</sup> cells. *N* = 3 per group. Data are presented as mean ± SD. Two-way ANOVA with Tukey's *post hoc* test was performed. \**p* < 0.05, \*\*\**p* < 0.001.
